# Supplementary material
Source: MDPI journal article supplement (https://www.mdpi.com/2073-4441/14/13/2066)
Supplement: s1 [file s1 › water-1740280-supplementary.pdf]

Supplemental Online Material for

" Role of Grain Size Distribution and Pier Aspect Ratio in Scouring and Sorting  
around Bridge Piers"

Takeyoshi CHIBANA <sup>1, \*</sup>, Rose QUIOCHO <sup>1</sup>, and Kenji WATANABE <sup>1</sup>

<sup>1</sup> Faculty of Engineering, Department of Civil Engineering, the University of Tokyo

Takeyoshi CHIBANA: \*Corresponding Author

chibana@hydra.t.u-tokyo.ac.jp

Rose E. QUIOCHO:

requiocho@alumni.u-tokyo.ac.jp

Kenji WATANABE

watanabe@civil.t.u-tokyo.ac.jp

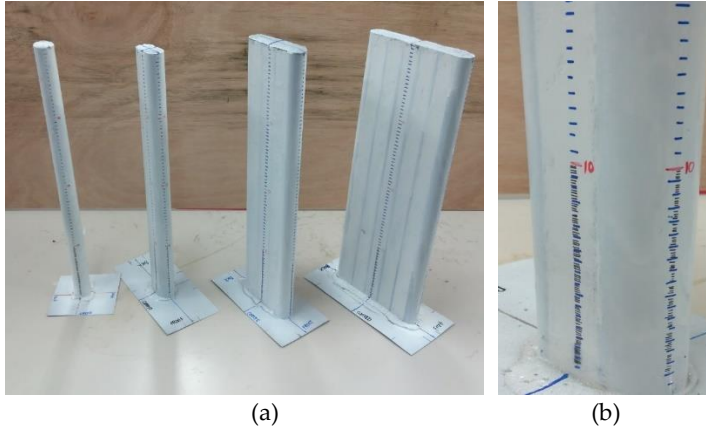

**Figure S1.** Four blunt-nosed cylindrical piers: (a) Graduated Piers of Varying Aspect Ratio; (b) Side Graduation

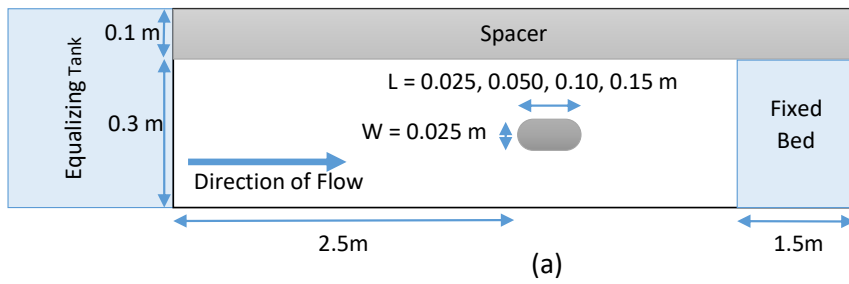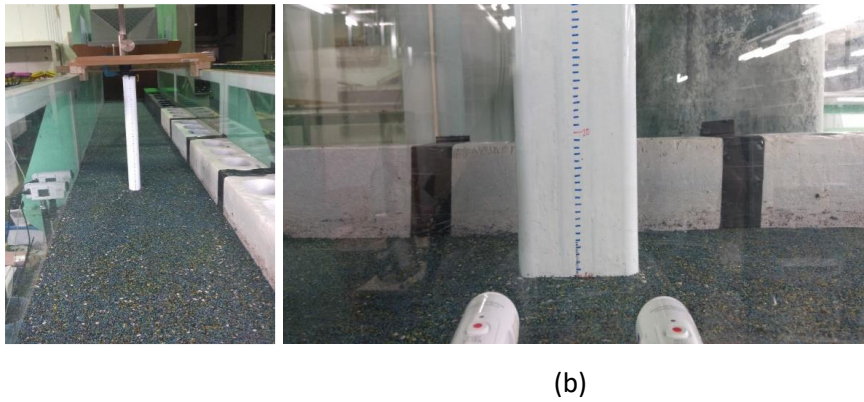

**Figure S2.** Set-up of the flume for Experiment: (a) Planar Design; (b) Actual Condition

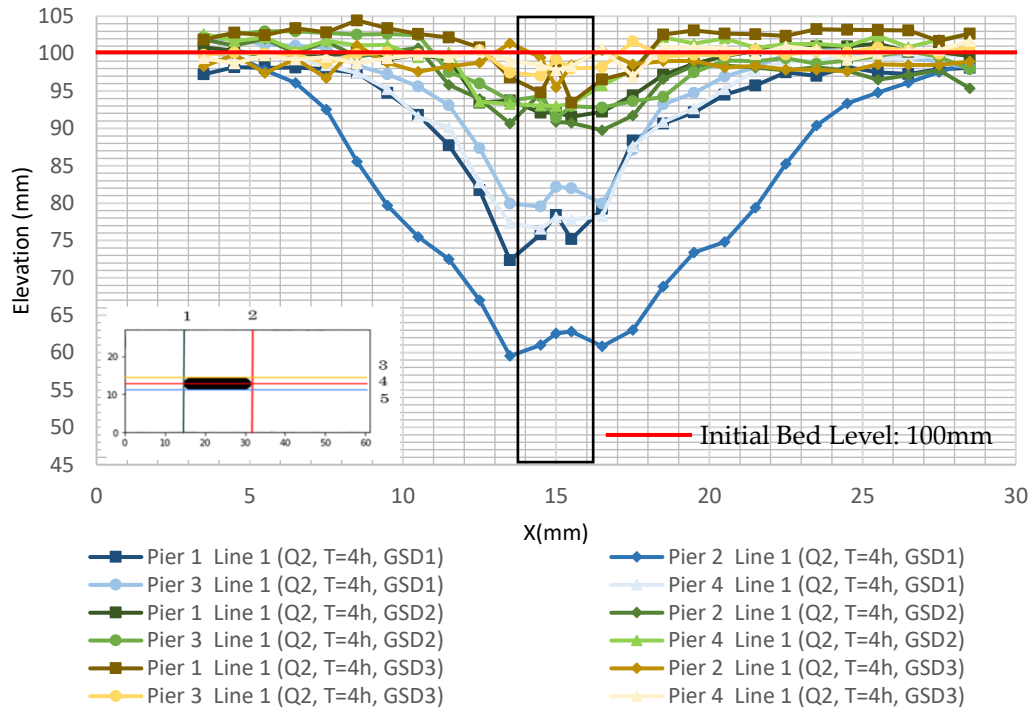

**Figure S3.** Cross-Section Profile along Line 1 for all Aspect Ratios and GSD (Q2, T=4h)

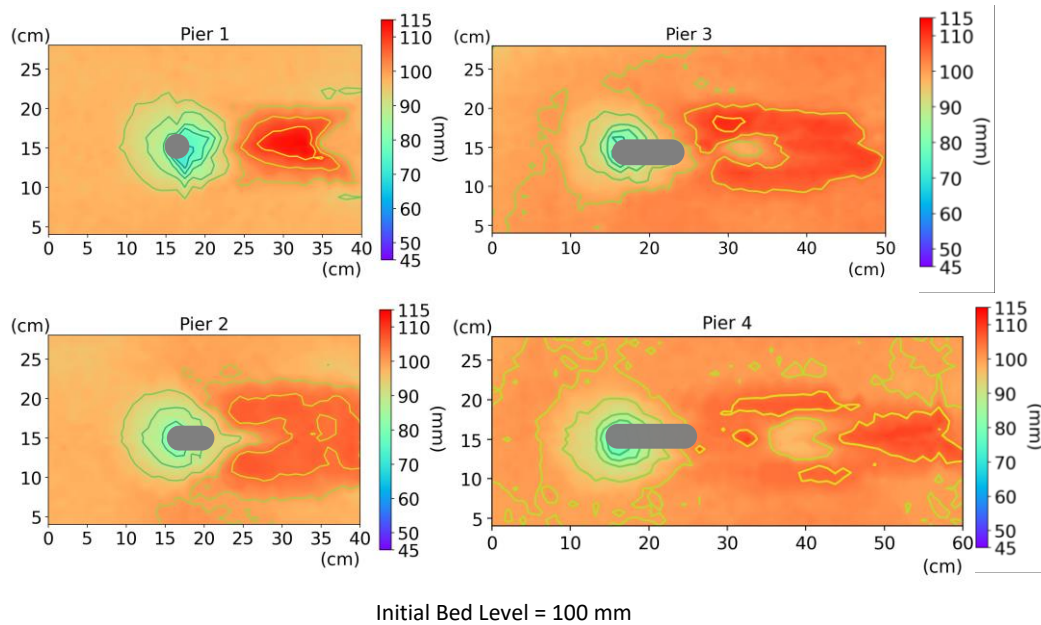

**Figure S4.** Bed Topology Around Piers on GSD1 (Q2, T=4h)

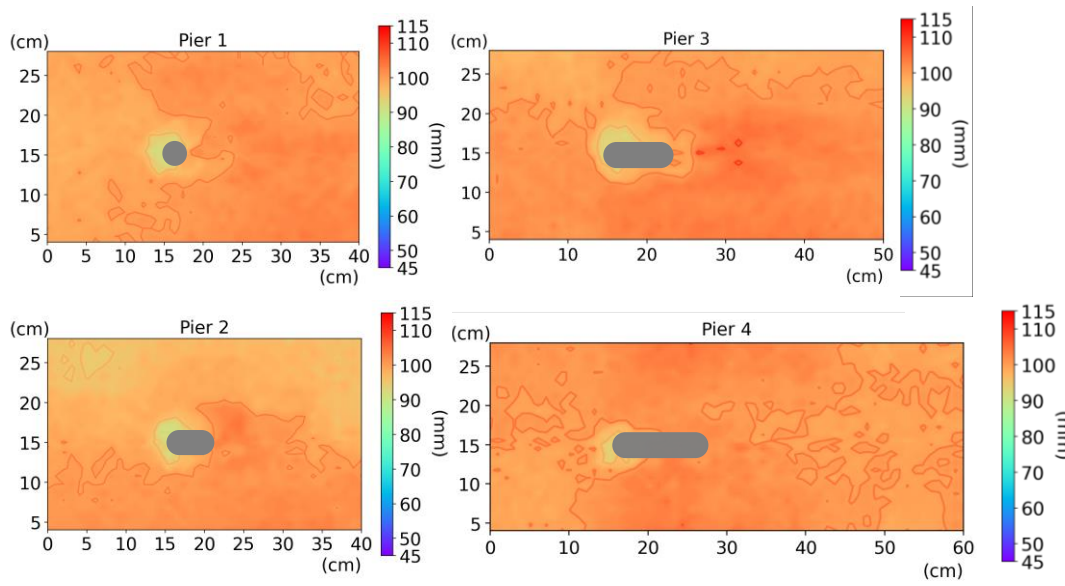

Initial Bed Level = 100 mm

**Figure S5.** Bed Topology Around Piers on GSD2 ( $Q_2$ ,  $T=4h$ )

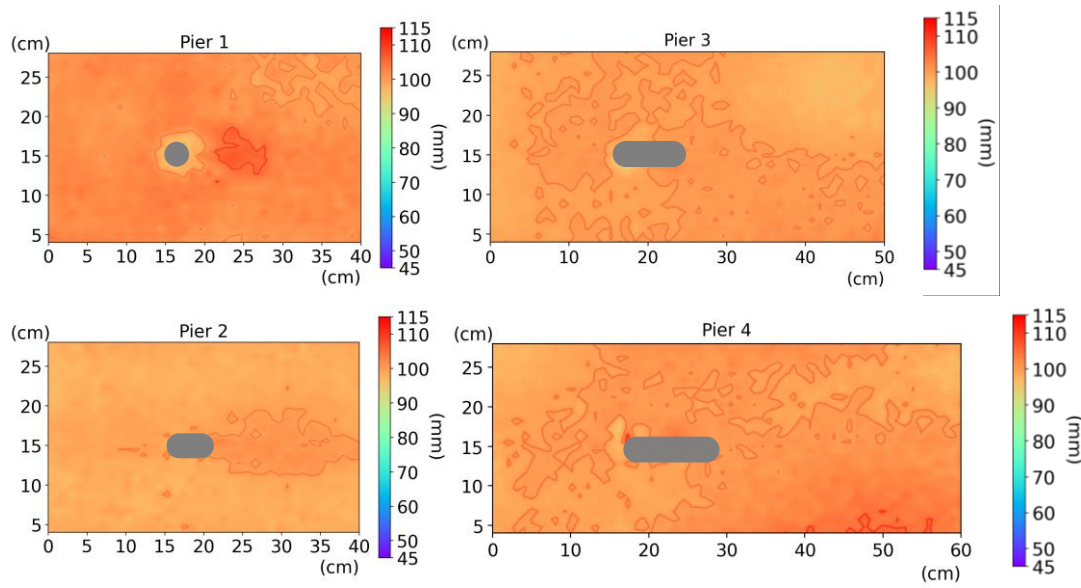

Initial Bed Level = 100 mm

**Figure S6.** Bed Topology Around Piers on GSD3 ( $Q_2$ ,  $T=4h$ )
